# Supplementary material for: Evaluation of the PEG Density in the PEGylated Chitosan Nanoparticles as a Drug Carrier for Curcumin and Mitoxantrone
Source: PubMed Central journal article supplement (PMC6071138; doi:10.3390/nano8070486), 2018-07-01
Supplement: nanomaterials-08-00486-s001.pdf [file nanomaterials-08-00486-s001.pdf]

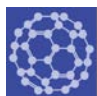

## Supplementary Materials

Article

# Evaluation of the PEG Density in the PEGylated Chitosan Nanoparticles as a Drug Carrier for Curcumin and Mitoxantrone

Yao Chen, Di Wu, Wu Zhong, Shu Kuang, QianLuo, Liujiang Song, Lihua He, Xing Feng and Xiaojun Tao \*

Key Laboratory of Study and Discovery of Small Targeted Molecules of Hunan Province, School of Medicine, Hunan Normal University, Changsha 410013, China; ychen@smail.hunnu.edu.cn (Y.C.); iswudi@smail.hunnu.edu.cn (D.W.); zwu123@smail.hunnu.edu.cn (W.Z.); shwkuang@smail.hunnu.edu.cn (S.K.); luoqian1996@smail.hunnu.edu.cn (Q.L.); song1221@hunnu.edu.cn (L.S.); hlh197@hunnu.edu.cn (L.H.); fengxing@hunnu.edu.cn (X.F.)

\* Correspondence: xjtao@hunnu.edu.cn (X.T.); Tel.: +86-182-2972-2319 (X.T.)

Received: 15 May 2018; Accepted: 8 June 2018; Published: date

**Table S1.** Supplemental data for calculating the combination index

| Sample      | P(MTO)/Q(CUR) | EC <sub>50</sub> (µg/mL) | R square | CI     |
|-------------|---------------|--------------------------|----------|--------|
| Free MTO    | -             | 2.830                    | 0.922    | -      |
| Free CUR    | -             | 28.64                    | 0.976    | -      |
| Combination | 1/1           | 7.226                    | 0.948    | 1.403  |
| Combination | 1/1.5         | 7.569                    | 0.937    | 1.228  |
| Combination | 1/2           | 4.460                    | 0.963    | 0.6291 |
| PCCM1       | 1/1.66        | 24.39                    | 0.952    | -      |
| PCCM2       | 1/1.72        | 21.30                    | 0.948    | -      |
| PCCM3       | 1/1.925       | 14.57                    | 0.968    | -      |

**Table S2.** Data for plotting the isobole

| CUR                                      |                |                           | MTO                                      |                |                           | Addition effect<br>(P <sub>x</sub> ) <sub>C</sub> +(P <sub>x</sub> ) <sub>M</sub> | Addition dose<br>(Dose <sub>C</sub> +Dose <sub>M</sub> )<br>(µg/mL) | Dose pair<br>(Dose <sub>C</sub> ,Dose <sub>M</sub> )<br>(µg/mL) |
|------------------------------------------|----------------|---------------------------|------------------------------------------|----------------|---------------------------|-----------------------------------------------------------------------------------|---------------------------------------------------------------------|-----------------------------------------------------------------|
| $\ln \frac{P_x}{1-P_x} = 4.613 - 3.223x$ |                |                           | $\ln \frac{P_x}{1-P_x} = 0.682 - 1.552x$ |                |                           |                                                                                   |                                                                     |                                                                 |
| (1-P <sub>x</sub> ) <sub>C</sub>         | X <sub>C</sub> | Dose <sub>C</sub> (µg/mL) | (1-P <sub>x</sub> ) <sub>M</sub>         | X <sub>M</sub> | Dose <sub>M</sub> (µg/mL) |                                                                                   |                                                                     |                                                                 |
| 0%                                       | -              | 0                         | 50%                                      | 0.4393         | 2.750                     | 50%                                                                               | 2.750                                                               | (0,2.750)                                                       |
| 10%                                      | 0.7495         | 5.617                     | 40%                                      | 0.1781         | 1.507                     | 50%                                                                               | 7.124                                                               | (5.617,1.507)                                                   |
| 20%                                      | 1.001          | 10.03                     | 30%                                      | -0.1065        | 0.7825                    | 50%                                                                               | 10.81                                                               | (10.03,0.7825)                                                  |
| 30%                                      | 1.168          | 14.74                     | 20%                                      | -0.4538        | 0.3517                    | 50%                                                                               | 15.09                                                               | (14.74,0.3517)                                                  |
| 40%                                      | 1.305          | 20.20                     | 10%                                      | -0.9763        | 0.1056                    | 50%                                                                               | 20.31                                                               | (20.20,0.1056)                                                  |
| 50%                                      | 1.431          | 27.00                     | 0%                                       | -              | 0                         | 50%                                                                               | 27.00                                                               | (27.00,0)                                                       |

Notes: Where “x” is a drug log<sub>10</sub> dose (CUR or MTO); “P<sub>x</sub>” is cell viability at log<sub>10</sub> dose; (1-P<sub>x</sub>) is the cell death at log<sub>10</sub> dose.

Dose pairs (Dose<sub>C</sub> and Dose<sub>M</sub>) that plotted as points on the isobole (Figure 7.2D) represented the combination doses to produce a total 50% of maximum effect. The slope and the intercept of the equation were derived from the dose-effect curves of free CUR and free MTO (Figure 7.2A,B).

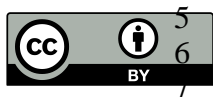

© 2018 by the authors. Submitted for possible open access publication under the terms and conditions of the Creative Commons Attribution (CC BY) license (<http://creativecommons.org/licenses/by/4.0/>).
